# Supplementary material for: Rational Development of a Carrier-Free Dry Powder Inhalation Formulation for Respiratory Viral Infections via Quality by Design: A Drug-Drug Cocrystal of Favipiravir and Theophylline
Source: MDPI journal article supplement (doi:10.3390/pharmaceutics14020300), 2022-01-27
Supplement: s1 [file s1]

# Supplementary Materials: Rational Development of a Carrier-Free Dry Powder Inhalation Formulation for Respiratory Viral Infections via Quality by Design: A Drug-Drug Cocrystal of Favipiravir and Theophylline

Si Nga Wong, Jingwen Weng, Ignatius Chun Wai Ip, Ruipeng Chen, Richard Lakerveld, Richard Telford, Nicholas Blagden, Ian J. Scowen and Shing Fung Chow

**Table S1.** Experimental outlet temperatures resulted in the DOE.

|                                | F1 | F2 | F3 | F4 | F5 | F6 | F7 | F8 | CPs |
|--------------------------------|----|----|----|----|----|----|----|----|-----|
| <b>Outlet Temperature (°C)</b> | 56 | 58 | 54 | 53 | 52 | 54 | 49 | 48 | 54  |

**Table S2.** The powder dispersion was performed at various flow rates to obtain 4 L passing air drawn into the next generation impactor (NGI) with designated pressure drops.

| Flow rate (L/min) | Pressure difference (kPa) | Time required (s) |
|-------------------|---------------------------|-------------------|
| 30                | 0.4                       | 8.0               |
| 40                | 0.7                       | 6.0               |
| 50                | 1.1                       | 4.8               |
| 60                | 1.4                       | 4.0               |

**Table S3.** Equilibrium solubilities of coformers and cocrystal at 20°C (n=3).

| Chemical Species | Aqueous Solubility (mg/mL) ( $\pm$ SD)       |
|------------------|----------------------------------------------|
| Raw FAV          | 2.29 $\pm$ 0.34                              |
| Raw THP          | 7.14 $\pm$ 0.47                              |
| FAV-THP          | FAV: 3.11 $\pm$ 0.03<br>THP: 3.42 $\pm$ 0.43 |

**Table S4.** Crystal data and structure refinement for THP:FAV.

| Identification code               | cu_IS_HKU_4FAV_THP_SEBatch2_0m              |                  |
|-----------------------------------|---------------------------------------------|------------------|
| Empirical formula                 | C12 H12 F N7 O4                             |                  |
| Formula weight                    | 337.29                                      |                  |
| Temperature                       | 173(2) K                                    |                  |
| Wavelength                        | 1.54178 Å                                   |                  |
| Crystal system                    | Monoclinic                                  |                  |
| Space group                       | P2 <sub>1</sub> /n                          |                  |
| Unit cell dimensions              | a = 13.3490(6) Å                            | = 90°.           |
|                                   | b = 7.3654(3) Å                             | = 107.7362(14)°. |
|                                   | c = 14.7643(6) Å                            | = 90°.           |
| Volume                            | 1382.64(10) Å <sup>3</sup>                  |                  |
| Z                                 | 4                                           |                  |
| Density (calculated)              | 1.620 Mg/m <sup>3</sup>                     |                  |
| Absorption coefficient            | 1.161 mm <sup>-1</sup>                      |                  |
| F(000)                            | 696                                         |                  |
| Crystal size                      | 0.296 x 0.220 x 0.076 mm <sup>3</sup>       |                  |
| Theta range for data collection   | 3.913 to 72.167°.                           |                  |
| Index ranges                      | -15<=h<=16, -9<=k<=9, -18<=l<=18            |                  |
| Reflections collected             | 41916                                       |                  |
| Independent reflections           | 2730 [R(int) = 0.0402]                      |                  |
| Completeness to theta = 67.679°   | 99.90%                                      |                  |
| Absorption correction             | Semi-empirical from equivalents             |                  |
| Max. and min. transmission        | 0.7536 and 0.6120                           |                  |
| Refinement method                 | Full-matrix least-squares on F <sup>2</sup> |                  |
| Data / restraints / parameters    | 2730 / 0 / 269                              |                  |
| Goodness-of-fit on F <sup>2</sup> | 1.033                                       |                  |
| Final R indices [I>2sigma(I)]     | R1 = 0.0356, wR2 = 0.0962                   |                  |
| R indices (all data)              | R1 = 0.0368, wR2 = 0.0974                   |                  |
| Extinction coefficient            | 0.0016(3)                                   |                  |
| Largest diff. peak and hole       | 0.314 and -0.174 e.Å <sup>-3</sup>          |                  |

**Table S5.** Atomic coordinates ( $\times 10^4$ ) and equivalent isotropic displacement parameters ( $\text{\AA}^2 \times 10^3$ )

for THP:FAV.  $U(\text{eq})$  is defined as one third of the trace of the orthogonalized  $U_{ij}$  tensor.

|       | <b>x</b> | <b>y</b> | <b>z</b> |
|-------|----------|----------|----------|
| C(10) | 5685(1)  | 1279(2)  | -7005(1) |
| O(10) | 6137(1)  | 1101(1)  | -3988(1) |
| N(10) | 5528(1)  | 962(2)   | -6166(1) |
| C(11) | 7033(1)  | 2328(2)  | -5975(1) |
| O(11) | 9156(1)  | 3896(1)  | -4104(1) |
| N(11) | 6592(1)  | 2129(2)  | -6930(1) |
| N(12) | 7981(1)  | 3128(1)  | -5519(1) |
| C(12) | 6403(1)  | 1628(2)  | -5482(1) |
| C(13) | 6667(1)  | 1688(2)  | -4477(1) |
| N(13) | 7638(1)  | 2524(2)  | -4062(1) |
| C(14) | 8313(1)  | 3221(2)  | -4542(1) |
| C(15) | 8012(1)  | 2678(3)  | -3023(1) |
| C(16) | 8680(1)  | 3772(2)  | -6049(1) |
| C(24) | 6472(1)  | 3635(2)  | 353(1)   |
| C(23) | 7839(1)  | 2181(2)  | -265(1)  |
| C(22) | 9338(1)  | 1012(2)  | 752(1)   |
| O(22) | 5960(1)  | 4116(1)  | -474(1)  |
| N(22) | 6147(1)  | 3925(2)  | 1100(1)  |
| C(21) | 8989(1)  | 1550(2)  | 1503(1)  |
| N(21) | 8757(1)  | 1327(2)  | -138(1)  |
| O(21) | 7266(1)  | 2496(2)  | -1163(1) |
| C(20) | 7501(1)  | 2698(2)  | 511(1)   |
| N(20) | 8098(1)  | 2361(1)  | 1407(1)  |
| F(20) | 9606(1)  | 1234(1)  | 2398(1)  |

**Table S6.** Bond lengths [Å] and angles [°] for THP:FAV.

|                   |            |
|-------------------|------------|
| C(10)-N(11)       | 1.3372(17) |
| C(10)-N(10)       | 1.3389(17) |
| C(10)-H(10)       | 0.950(17)  |
| O(10)-C(13)       | 1.2317(15) |
| N(10)-C(12)       | 1.3806(15) |
| N(10)-H(10N)      | 0.891(18)  |
| C(11)-N(11)       | 1.3609(15) |
| C(11)-C(12)       | 1.3691(17) |
| C(11)-N(12)       | 1.3724(15) |
| O(11)-C(14)       | 1.2198(15) |
| N(12)-C(14)       | 1.3763(15) |
| N(12)-C(16)       | 1.4678(15) |
| C(12)-C(13)       | 1.4180(16) |
| C(13)-N(13)       | 1.3971(16) |
| N(13)-C(14)       | 1.4018(15) |
| N(13)-C(15)       | 1.4662(16) |
| C(15)-H(151)      | 1.00(2)    |
| C(15)-H(152)      | 1.03(2)    |
| C(15)-H(153)      | 0.92(2)    |
| C(16)-H(161)      | 0.92(3)    |
| C(16)-H(162)      | 0.94(2)    |
| C(16)-H(163)      | 1.00(2)    |
| C(16)-H(164)      | 1.0831(14) |
| C(16)-H(165)      | 0.9932(14) |
| C(16)-H(166)      | 1.0781(14) |
| C(24)-O(22)       | 1.2555(15) |
| C(24)-N(22)       | 1.3192(16) |
| C(24)-C(20)       | 1.4906(18) |
| C(23)-O(21)       | 1.3333(17) |
| C(23)-N(21)       | 1.3393(18) |
| C(23)-C(20)       | 1.4064(18) |
| C(22)-N(21)       | 1.328(2)   |
| C(22)-C(21)       | 1.3845(19) |
| C(22)-H(22)       | 0.966(17)  |
| N(22)-H(23N)      | 0.898(18)  |
| N(22)-H(22N)      | 0.890(18)  |
| C(21)-N(20)       | 1.2996(17) |
| C(21)-F(20)       | 1.3487(16) |
| O(21)-H(21O)      | 0.93(2)    |
| C(20)-N(20)       | 1.3427(16) |
| N(11)-C(10)-N(10) | 113.50(11) |

|                     |            |
|---------------------|------------|
| N(11)-C(10)-H(10)   | 123.0(10)  |
| N(10)-C(10)-H(10)   | 123.5(10)  |
| C(10)-N(10)-C(12)   | 106.14(10) |
| C(10)-N(10)-H(10N)  | 127.5(11)  |
| C(12)-N(10)-H(10N)  | 126.3(11)  |
| N(11)-C(11)-C(12)   | 111.61(11) |
| N(11)-C(11)-N(12)   | 126.70(11) |
| C(12)-C(11)-N(12)   | 121.69(11) |
| C(10)-N(11)-C(11)   | 103.34(10) |
| C(11)-N(12)-C(14)   | 119.32(10) |
| C(11)-N(12)-C(16)   | 121.24(10) |
| C(14)-N(12)-C(16)   | 119.30(10) |
| C(11)-C(12)-N(10)   | 105.40(10) |
| C(11)-C(12)-C(13)   | 123.21(11) |
| N(10)-C(12)-C(13)   | 131.37(11) |
| O(10)-C(13)-N(13)   | 121.30(11) |
| O(10)-C(13)-C(12)   | 126.77(11) |
| N(13)-C(13)-C(12)   | 111.93(10) |
| C(13)-N(13)-C(14)   | 126.43(10) |
| C(13)-N(13)-C(15)   | 117.85(10) |
| C(14)-N(13)-C(15)   | 115.70(10) |
| O(11)-C(14)-N(12)   | 121.73(11) |
| O(11)-C(14)-N(13)   | 120.88(11) |
| N(12)-C(14)-N(13)   | 117.39(10) |
| N(13)-C(15)-H(151)  | 107.5(11)  |
| N(13)-C(15)-H(152)  | 108.6(13)  |
| H(151)-C(15)-H(152) | 109.4(18)  |
| N(13)-C(15)-H(153)  | 107.7(13)  |
| H(151)-C(15)-H(153) | 111.6(18)  |
| H(152)-C(15)-H(153) | 111.9(19)  |
| N(12)-C(16)-H(161)  | 109.6(15)  |
| N(12)-C(16)-H(162)  | 110.5(13)  |
| H(161)-C(16)-H(162) | 103(2)     |
| N(12)-C(16)-H(163)  | 108.3(12)  |
| H(161)-C(16)-H(163) | 111.8(19)  |
| H(162)-C(16)-H(163) | 113.9(17)  |
| N(12)-C(16)-H(164)  | 108.14(10) |
| N(12)-C(16)-H(165)  | 110.58(11) |
| H(164)-C(16)-H(165) | 116.02(12) |
| N(12)-C(16)-H(166)  | 112.38(11) |
| H(164)-C(16)-H(166) | 105.77(11) |
| H(165)-C(16)-H(166) | 103.89(11) |
| O(22)-C(24)-N(22)   | 123.21(12) |
| O(22)-C(24)-C(20)   | 119.05(11) |

|                     |            |
|---------------------|------------|
| N(22)-C(24)-C(20)   | 117.73(11) |
| O(21)-C(23)-N(21)   | 116.32(12) |
| O(21)-C(23)-C(20)   | 122.33(13) |
| N(21)-C(23)-C(20)   | 121.34(12) |
| N(21)-C(22)-C(21)   | 120.29(13) |
| N(21)-C(22)-H(22)   | 119.0(9)   |
| C(21)-C(22)-H(22)   | 120.7(9)   |
| C(24)-N(22)-H(23N)  | 116.8(11)  |
| C(24)-N(22)-H(22N)  | 121.0(11)  |
| H(23N)-N(22)-H(22N) | 121.5(15)  |
| N(20)-C(21)-F(20)   | 116.86(12) |
| N(20)-C(21)-C(22)   | 124.42(13) |
| F(20)-C(21)-C(22)   | 118.71(12) |
| C(22)-N(21)-C(23)   | 117.02(12) |
| C(23)-O(21)-H(21O)  | 102.8(14)  |
| N(20)-C(20)-C(23)   | 120.78(12) |
| N(20)-C(20)-C(24)   | 118.80(11) |
| C(23)-C(20)-C(24)   | 120.42(12) |
| C(21)-N(20)-C(20)   | 116.14(11) |

**Table S7.** Anisotropic displacement parameters ( $\text{\AA}^2 \times 10^3$ ) for THP:FAV. The anisotropicdisplacement factor exponent takes the form:  $-2 \sum_{h,k,l} [h^2 a^{*2} U^{11} + \dots + 2 h k a^* b^* U^{12}]$ 

|       | $U^{11}$ | $U^{22}$ | $U^{33}$ | $U^{23}$ | $U^{13}$ | $U^{12}$ |
|-------|----------|----------|----------|----------|----------|----------|
| C(10) | 22(1)    | 33(1)    | 21(1)    | -1(1)    | 4(1)     | 0(1)     |
| O(10) | 26(1)    | 41(1)    | 26(1)    | 1(1)     | 12(1)    | -9(1)    |
| N(10) | 16(1)    | 30(1)    | 23(1)    | -1(1)    | 5(1)     | -3(1)    |
| C(11) | 18(1)    | 20(1)    | 21(1)    | 1(1)     | 6(1)     | 3(1)     |
| O(11) | 23(1)    | 44(1)    | 26(1)    | -3(1)    | 6(1)     | -12(1)   |
| N(11) | 22(1)    | 31(1)    | 20(1)    | 1(1)     | 6(1)     | 1(1)     |
| N(12) | 20(1)    | 25(1)    | 20(1)    | 1(1)     | 8(1)     | -2(1)    |
| C(12) | 17(1)    | 22(1)    | 22(1)    | 0(1)     | 5(1)     | 1(1)     |
| C(13) | 18(1)    | 24(1)    | 24(1)    | 0(1)     | 8(1)     | 0(1)     |
| N(13) | 21(1)    | 34(1)    | 18(1)    | -1(1)    | 6(1)     | -6(1)    |
| C(14) | 19(1)    | 26(1)    | 23(1)    | 1(1)     | 7(1)     | -2(1)    |
| C(15) | 39(1)    | 70(1)    | 20(1)    | -4(1)    | 10(1)    | -23(1)   |
| C(16) | 22(1)    | 30(1)    | 28(1)    | 2(1)     | 12(1)    | -2(1)    |
| C(24) | 26(1)    | 21(1)    | 24(1)    | 0(1)     | 10(1)    | -4(1)    |
| C(23) | 33(1)    | 26(1)    | 28(1)    | -2(1)    | 16(1)    | -4(1)    |
| C(22) | 28(1)    | 27(1)    | 43(1)    | -2(1)    | 18(1)    | 0(1)     |
| O(22) | 33(1)    | 35(1)    | 24(1)    | 3(1)     | 10(1)    | 4(1)     |
| N(22) | 24(1)    | 30(1)    | 25(1)    | 1(1)     | 10(1)    | 3(1)     |
| C(21) | 26(1)    | 27(1)    | 32(1)    | 0(1)     | 11(1)    | -1(1)    |
| N(21) | 35(1)    | 33(1)    | 39(1)    | -4(1)    | 22(1)    | 0(1)     |
| O(21) | 44(1)    | 53(1)    | 25(1)    | -2(1)    | 17(1)    | 4(1)     |
| C(20) | 27(1)    | 20(1)    | 26(1)    | -1(1)    | 13(1)    | -4(1)    |
| N(20) | 25(1)    | 24(1)    | 27(1)    | -1(1)    | 11(1)    | -2(1)    |
| F(20) | 31(1)    | 51(1)    | 35(1)    | 3(1)     | 7(1)     | 9(1)     |

**Table S8.** Hydrogen coordinates ( $\times 10^4$ ) and isotropic displacement parameters ( $\text{\AA}^2 \times 10^3$ ) for THP:FAV.

|        | x         | y        | z         | U(eq)  |
|--------|-----------|----------|-----------|--------|
| H(10N) | 4987(14)  | 390(20)  | -6060(12) | 36(4)  |
| H(151) | 8192(16)  | 3980(30) | -2865(14) | 55(6)  |
| H(152) | 8680(20)  | 1900(30) | -2770(16) | 71(7)  |
| H(153) | 7476(18)  | 2290(30) | -2794(15) | 65(7)  |
| H(161) | 9240(20)  | 2970(30) | -5963(16) | 27(6)  |
| H(162) | 9017(17)  | 4850(30) | -5782(14) | 16(5)  |
| H(163) | 8258(17)  | 3890(30) | -6738(16) | 18(5)  |
| H(164) | 9465      | 3906     | -5555     | 58(17) |
| H(165) | 8385      | 4875     | -6423     | 40(13) |
| H(166) | 8747      | 2812     | -6579     | 14(9)  |
| H(10)  | 5197(13)  | 950(20)  | -7599(12) | 34(4)  |
| H(23N) | 5506(14)  | 4420(20) | 989(11)   | 37(4)  |
| H(22N) | 6507(14)  | 3500(20) | 1671(13)  | 35(4)  |
| H(22)  | 10012(13) | 420(20)  | 868(11)   | 33(4)  |
| H(21O) | 6678(19)  | 3080(30) | -1096(16) | 67(7)  |



**Table S9.** Hydrogen bonds with H...A < r(A) + 2.000 Angstroms and <DHA> 110 deg for THP:FAV.

| D-H                   | d(D-H) | d(H...A) | <DHA   | d(D...A) | A                            |
|-----------------------|--------|----------|--------|----------|------------------------------|
| N10-H10N              | 0.891  | 1.877    | 169.77 | 2.758    | O10 [ -x+1, -y, -z-1 ]       |
| C15-H153              | 0.924  | 2.27     | 110.4  | 2.733    | O10                          |
| C15-H153              | 0.924  | 2.512    | 131.07 | 3.196    | O21                          |
| C16-H164 <sup>b</sup> | 1.083  | 2.613    | 121.32 | 3.308    | O11 [ -x+2, -y+1, -z-1 ]     |
| C16-H166 <sup>b</sup> | 1.078  | 2.45     | 156.35 | 3.464    | F20 [ x, y, z-1 ]            |
| C10-H10               | 0.95   | 2.237    | 161.37 | 3.152    | O11 [ x-1/2, -y+1/2, z-1/2 ] |
| N22-H23N              | 0.898  | 2.161    | 167.78 | 3.044    | O22 [ -x+1, -y+1, -z ]       |
| N22-H22N              | 0.89   | 2.27     | 151.79 | 3.083    | N11 [ x, y, z+1 ]            |
| C22-H22               | 0.966  | 2.569    | 146.28 | 3.414    | N21 [ -x+2, -y, -z ]         |
| O21-H21O              | 0.925  | 1.699    | 154.55 | 2.565    | O22                          |

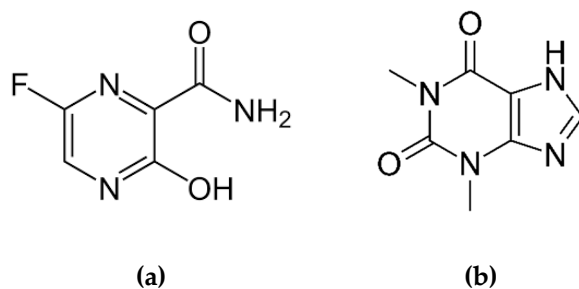

**Figure S1.** Chemical structures of the two APIs (a) Favipiravir and (b) Theophylline.

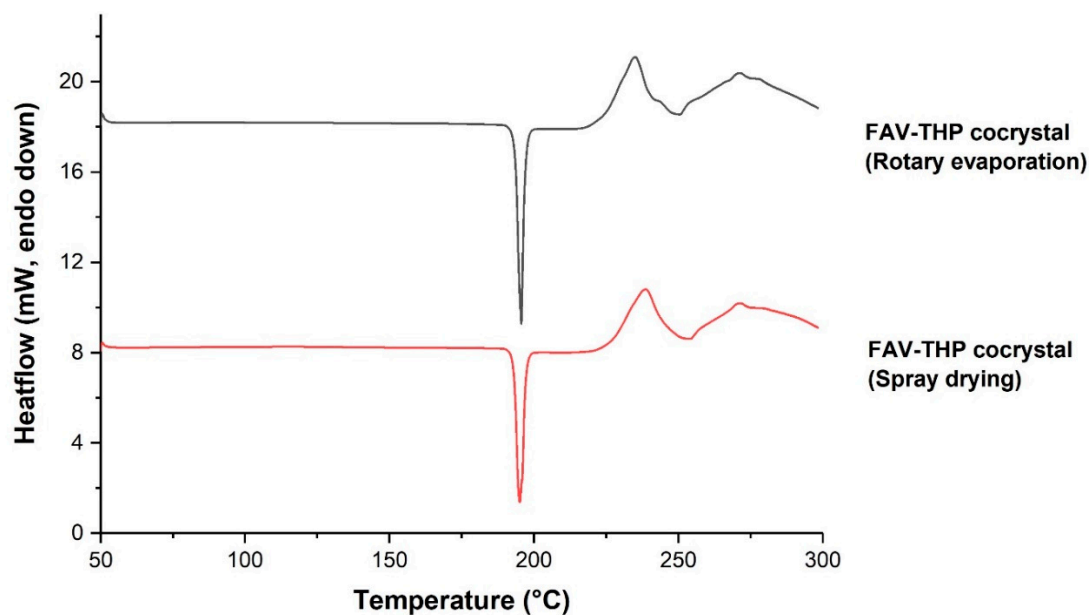

**Figure S2.** DSC thermograms of the FAV-THP cocrystal produced by rotary evaporation and spray drying after stability test.

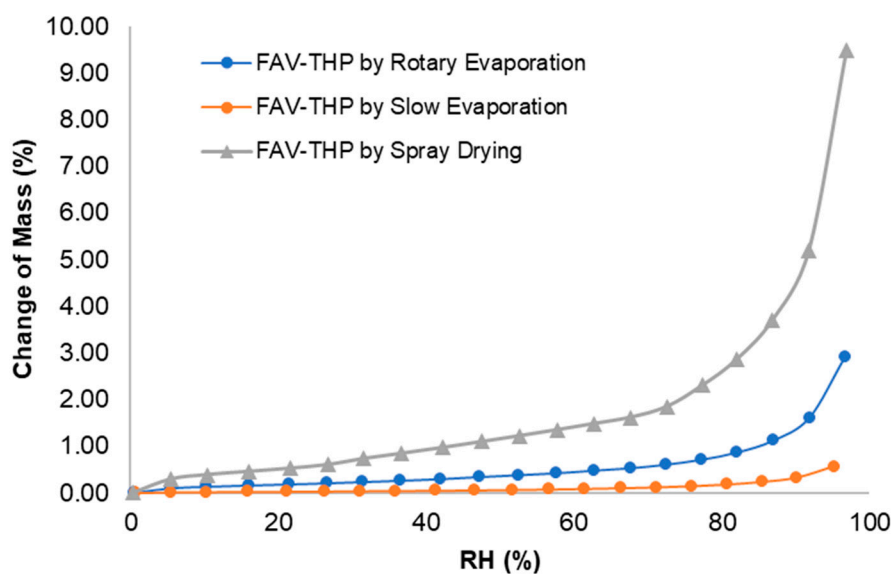

**Figure S3.** Water sorption isotherms at 25 °C of the FAV-THP cocrystals produced by different methods.

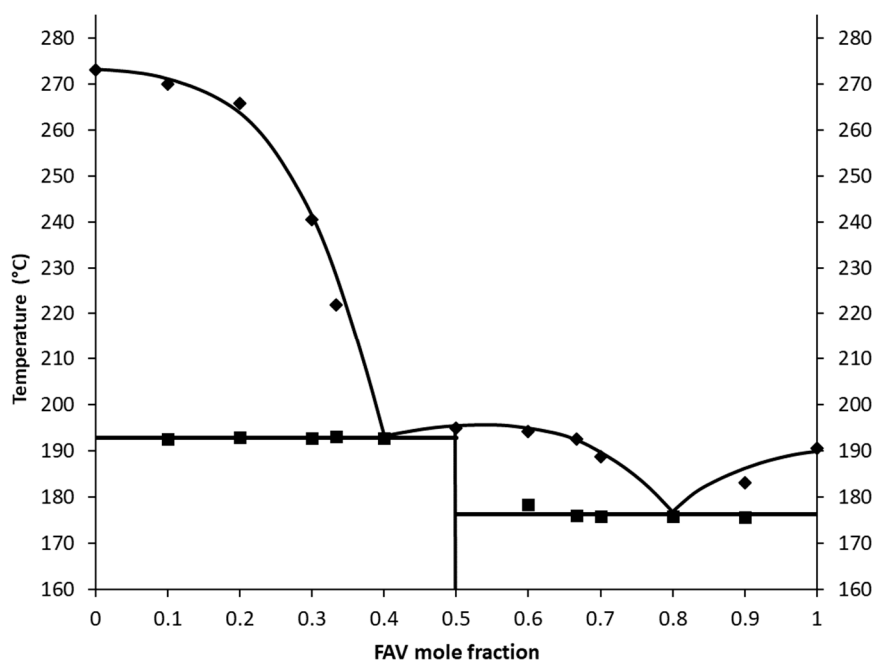

**Figure S4.** Temperature–composition phase diagram of the FAV-THP cocrystal system.

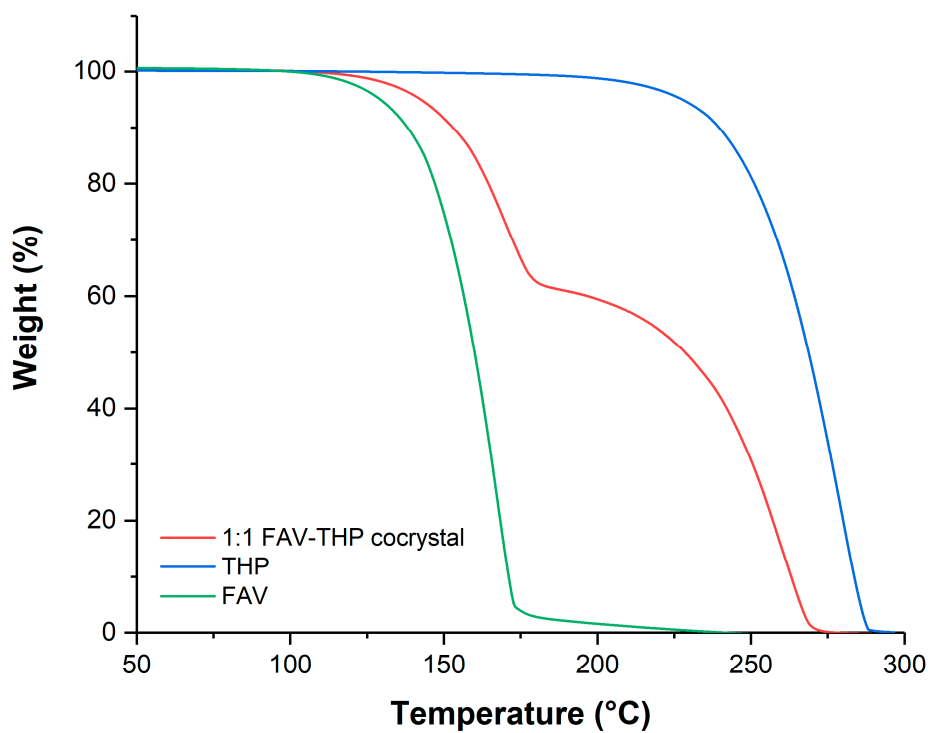

**Figure S5.** TGA profiles of the FAV-THP cocrystal system.

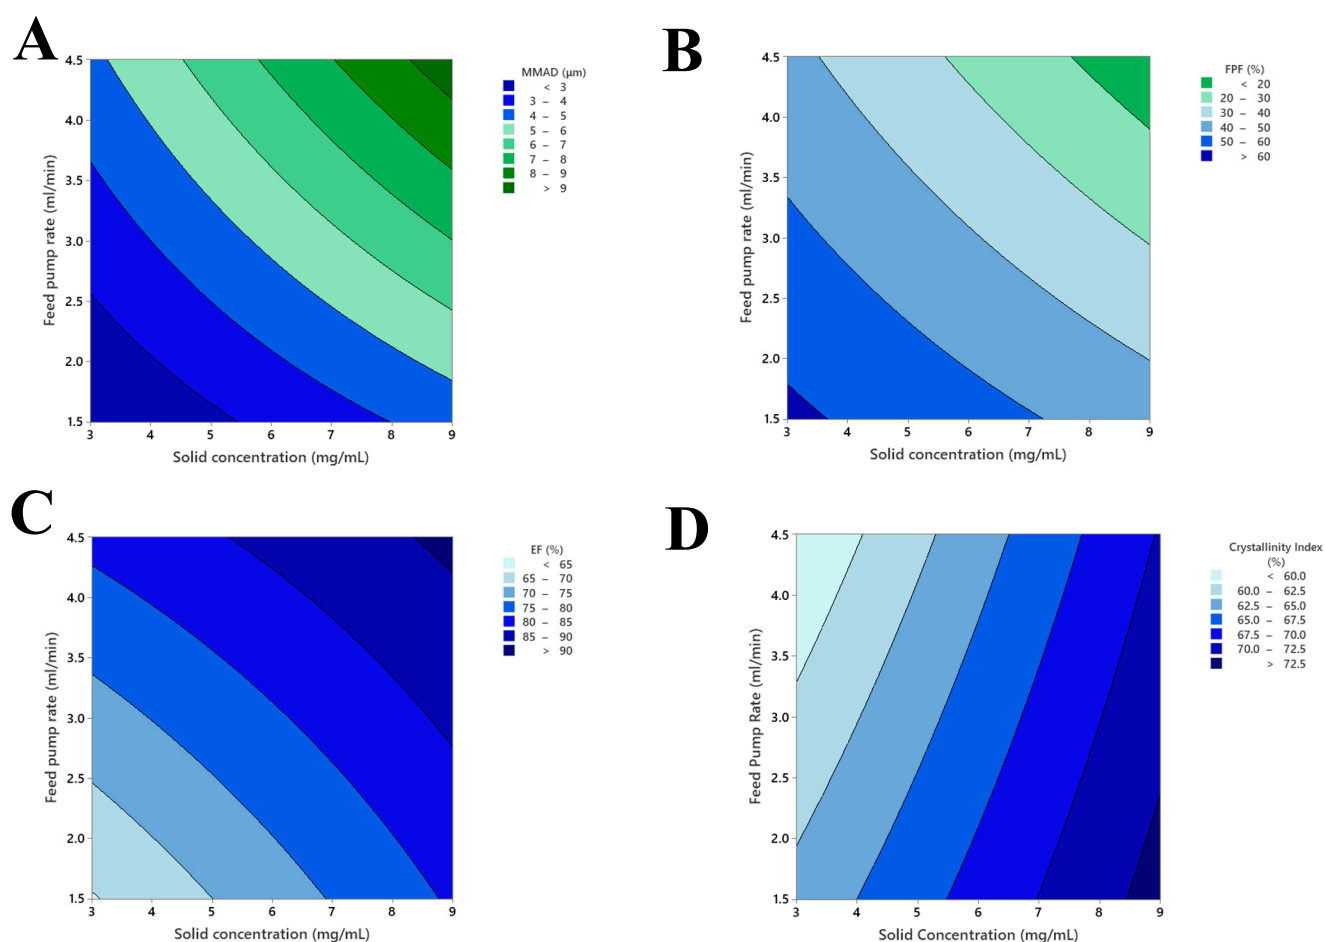

**Figure S6.** 2D contour plots for the (A) MMAD, (B) FPF, (C) EF, and (D) CI as projections of the total solute concentration (x-axis) and the feed pump rate (y-axis), holding a high level atomizing gas flow. The blue color represents areas within the design space where the defined limits, MMAD of  $<5\ \mu\text{m}$ , FPF of  $\geq 30\%$ , EF of  $\geq 60\%$  and CI of  $\geq 50\%$ , are fulfilled.

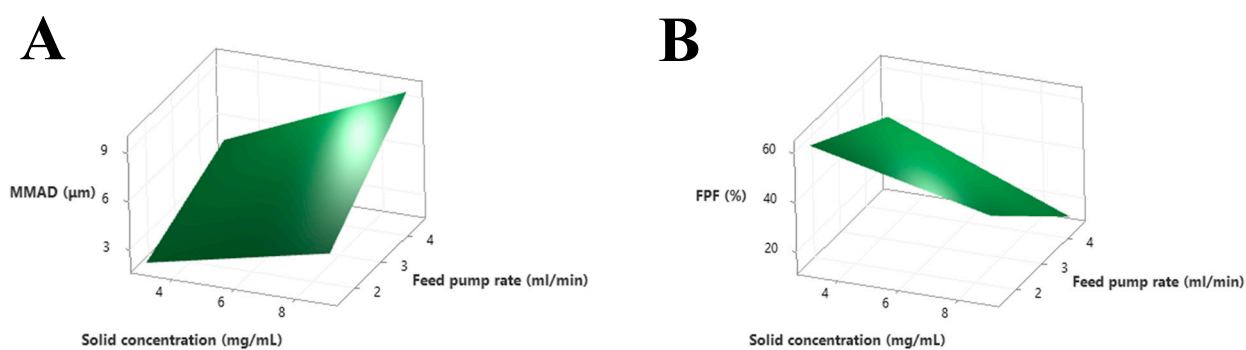

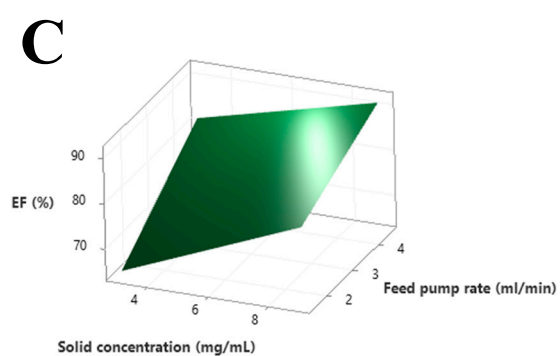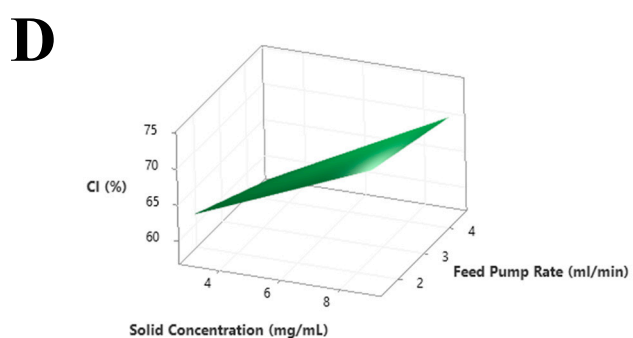

**Figure S7.** 3D surface plots for the (A) MMAD, (B) FPF, (C) EF, and (D) CI at high level atomizing gas flow.

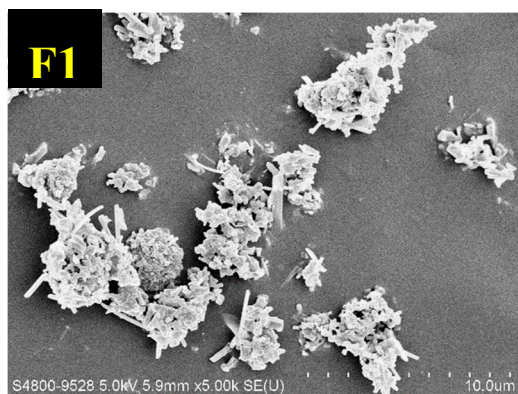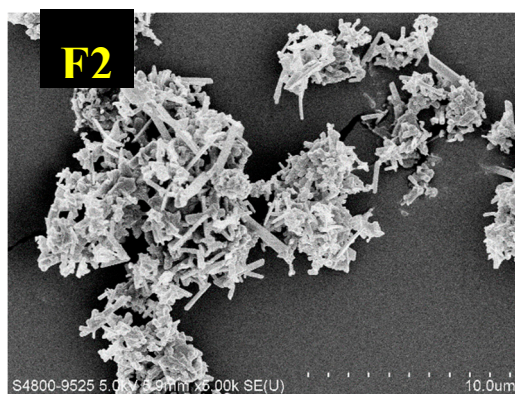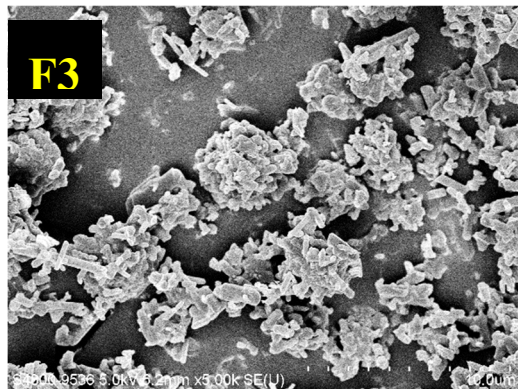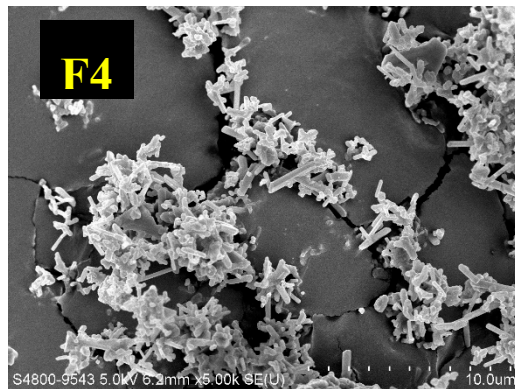



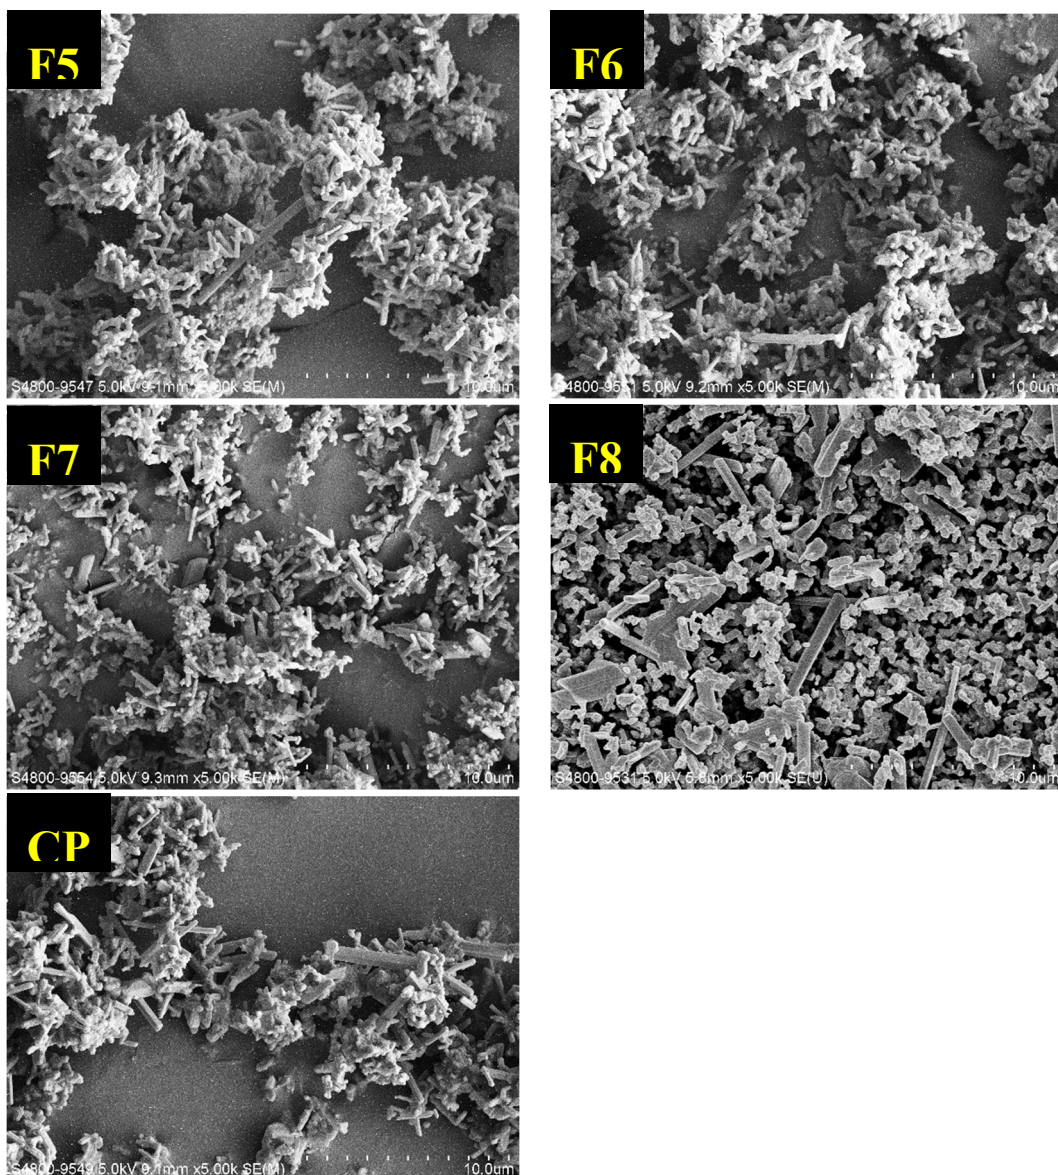

**Figure S8.** Scanning electron micrographs of different spray-dried cocrystal dry powder formulations at 5000× magnification.

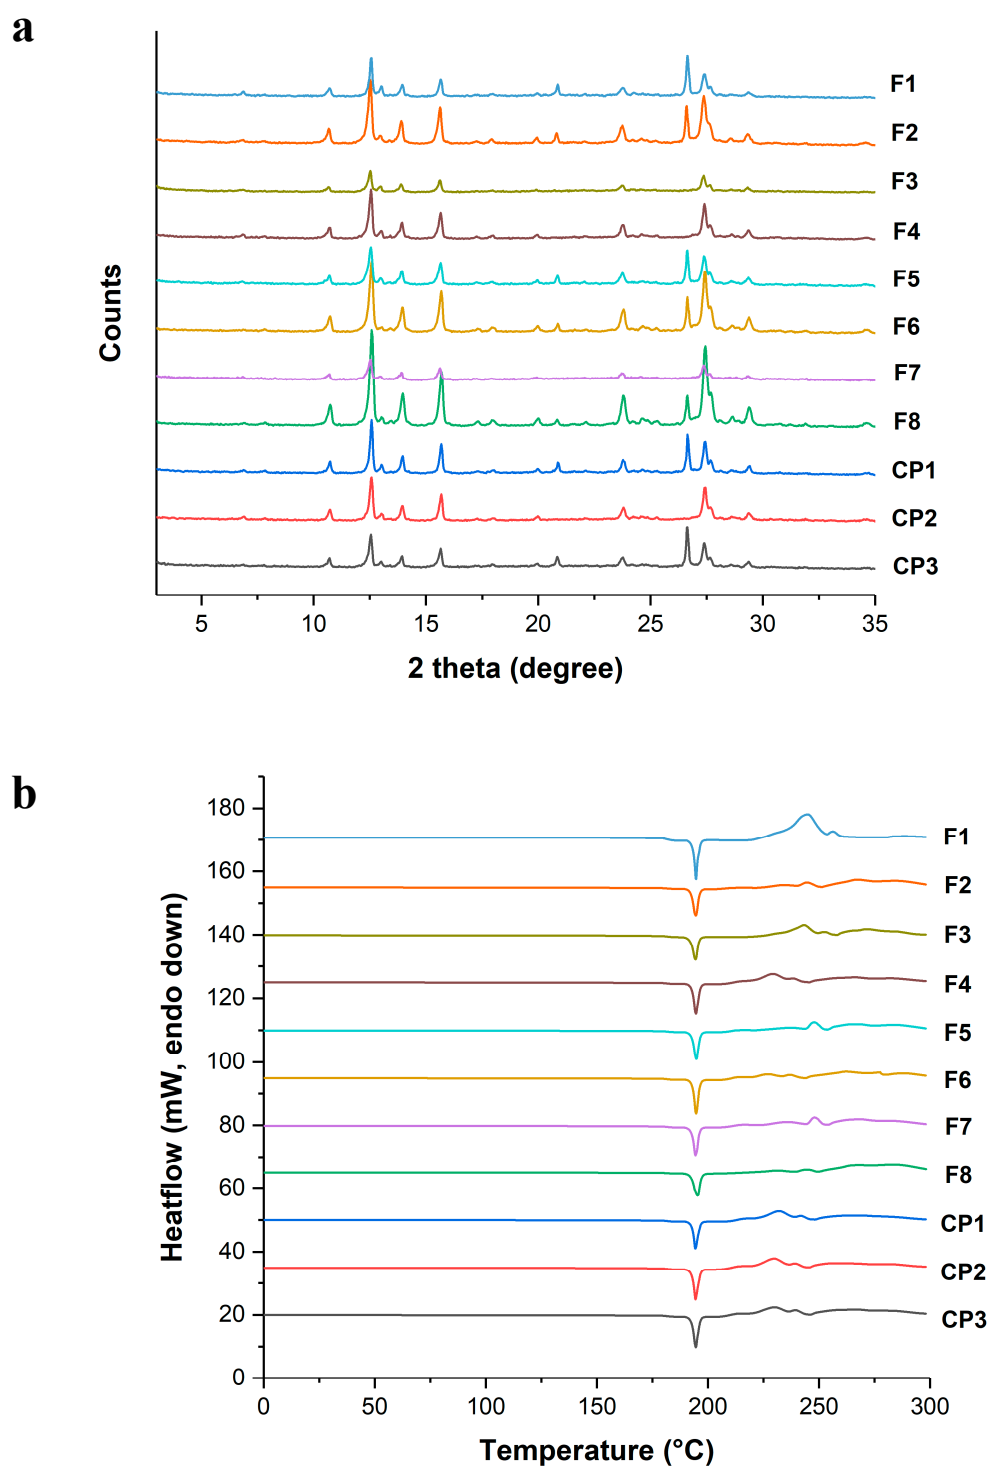

**Figure S9.** PXRD (a) and DSC (b) profiles of different spray-dried FAV-THP formulations.
